# Supplementary material for: Impact of proton-induced transmutation doping in semiconductors for space applications
Source: Royal Society of Chemistry journal article supplement (doi:10.1039/c9tc02995h), 2019-01-01
Supplement: c9tc02995h1.pdf [file c9tc02995h1.pdf]

Cite this: DOI: 00.0000/xxxxxxxxxx

**Supplemental Material: Impact of proton-induced transmutation doping in semiconductors for space applications**

## 1 Experimental Data Processing

The linear calibration function and detector efficiency calibration function for the Canberra Industries Genie-2000 Spectroscopy System High Purity Ge Detector are shown in Fig. 1 and Fig. 2 respectively.?

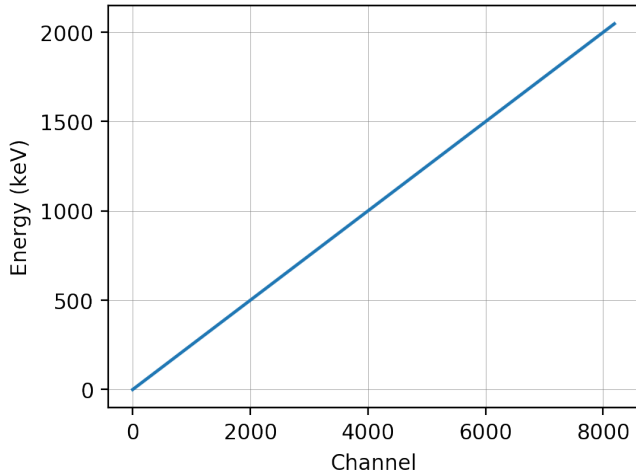

**Fig. 1** Channel-to-energy calibration function for the HPGe detector system used in this work to quantify transmutation of an irradiated GaAs sample.

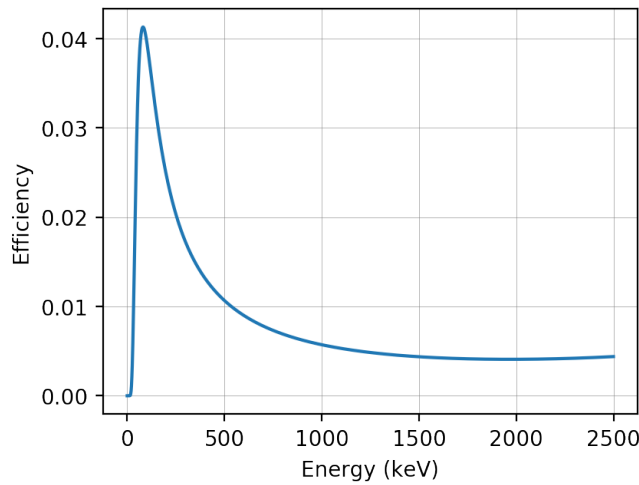

**Fig. 2** Efficiency function for the HPGe detector system used in this work to quantify transmutation of an irradiated GaAs sample. This includes detector and geometrical efficiency.

## 2 Orbit Dominant Temporal Impurity Concentrations

This section contains the impurity concentrations for inclined nonpolar low earth orbit (LEO), polar sun-synchronous LEO, semi-synchronous medium earth orbit (MEO), and geostationary orbit (GEO) for GaAs,  $\text{Hg}_{0.7}\text{Cd}_{0.3}\text{Te}$ ,  $\text{InAs}_{0.91}\text{Sb}_{0.09}$ , InAs,  $\text{InSb}_{0.5}\text{Bi}_{0.5}$ ,  $\text{InSb}_{0.95}\text{Bi}_{0.05}$ , InSb and Si over the course of 10 years of operation.

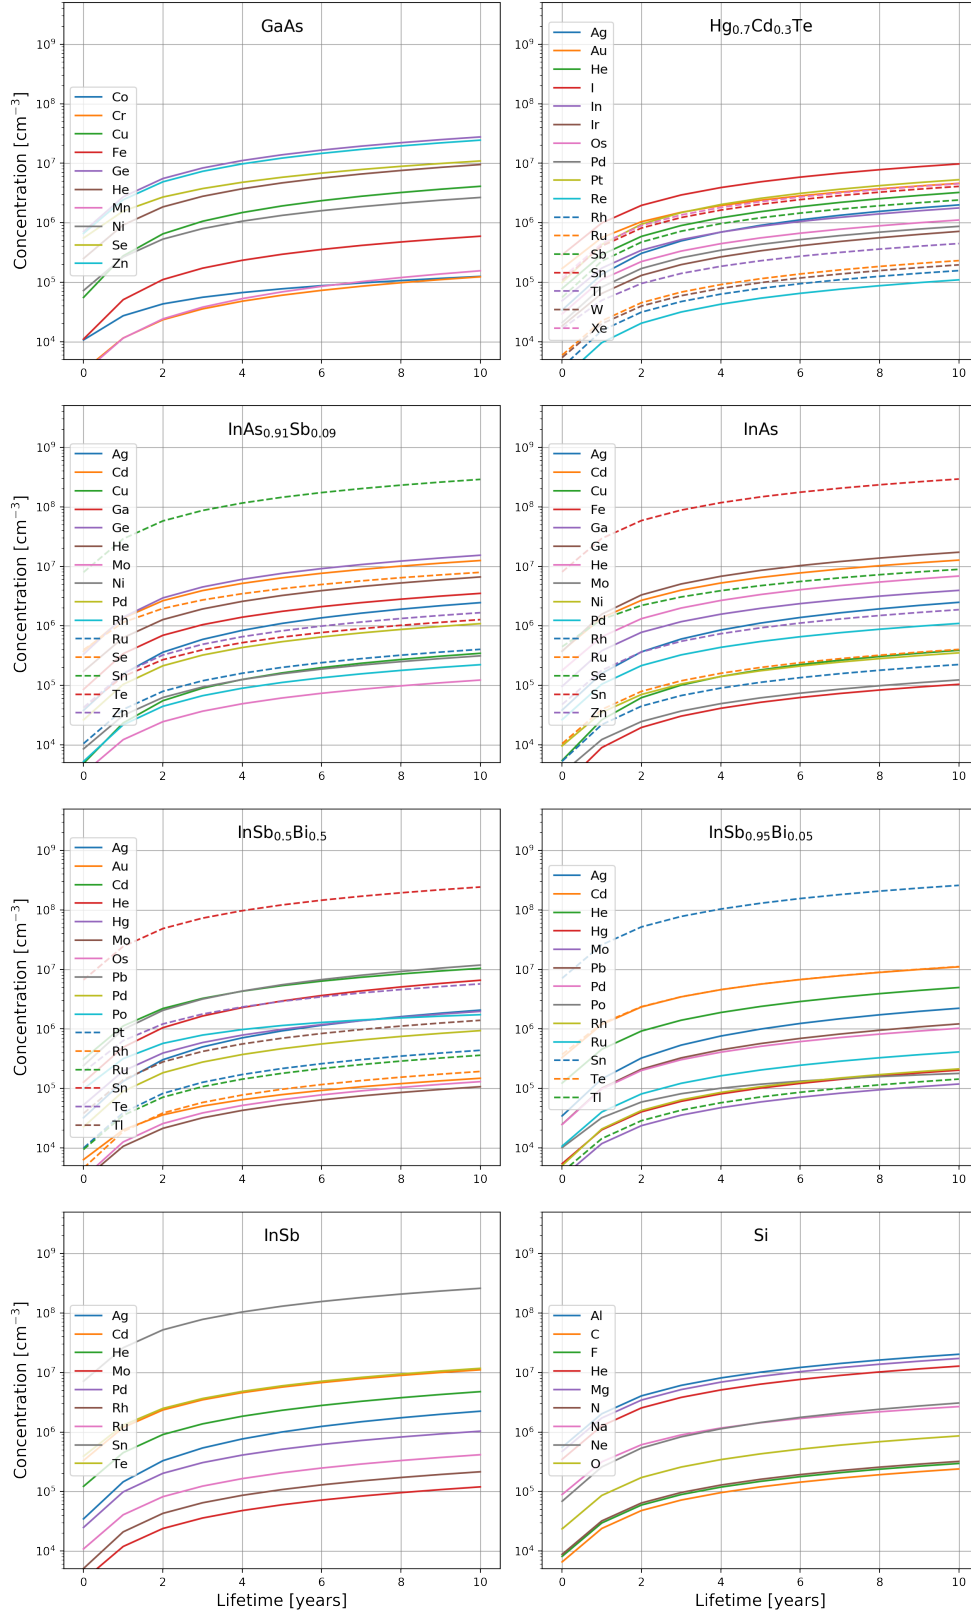

**Fig. 3** Impurity concentration ( $\text{cm}^{-3}$ ) for elements with concentrations in excess of  $> 10^5 \text{ cm}^{-3}$  for GaAs,  $\text{Hg}_{0.7}\text{Cd}_{0.3}\text{Te}$ ,  $\text{InAs}_{0.91}\text{Sb}_{0.09}$ , InAs,  $\text{InSb}_{0.5}\text{Bi}_{0.5}$ ,  $\text{InSb}_{0.95}\text{Bi}_{0.05}$ , InSb and Si as a function of lifetime in inclined nonpolar LEO.

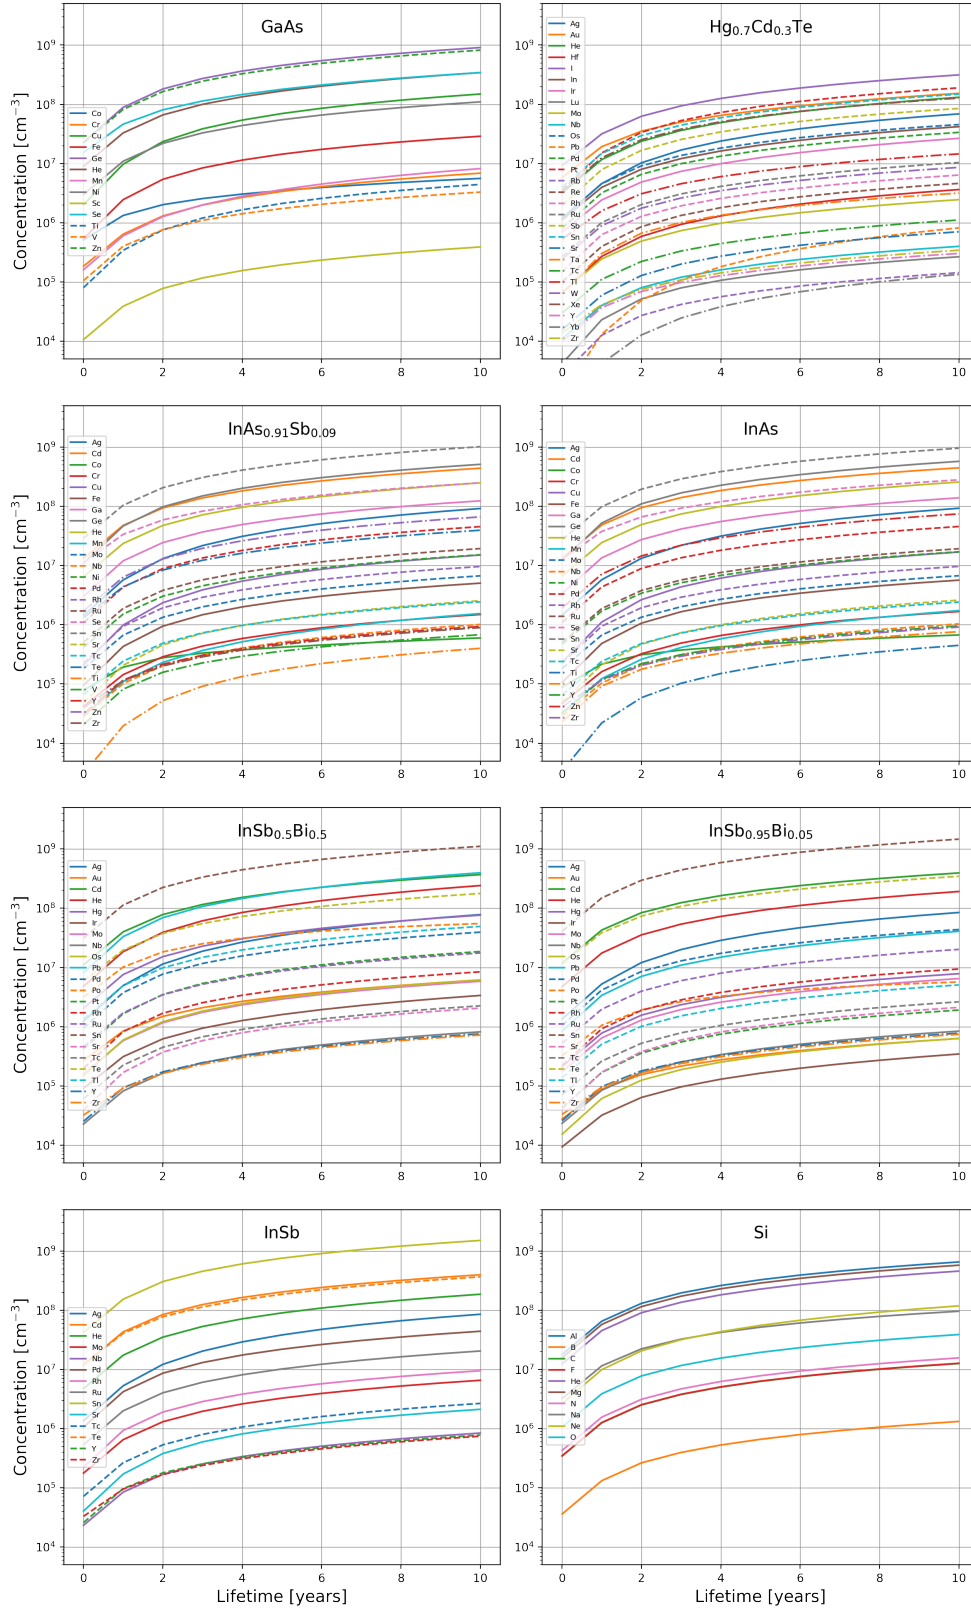

**Fig. 4** Impurity concentration ( $cm^{-3}$ ) for elements with concentrations in excess of  $> 10^5 cm^{-3}$  for GaAs,  $Hg_{0.7}Cd_{0.3}Te$ ,  $InAs_{0.91}Sb_{0.09}$ , InAs,  $InSb_{0.5}Bi_{0.5}$ ,  $InSb_{0.95}Bi_{0.05}$ , InSb and Si as a function of lifetime in polar sun-synchronous LEO.

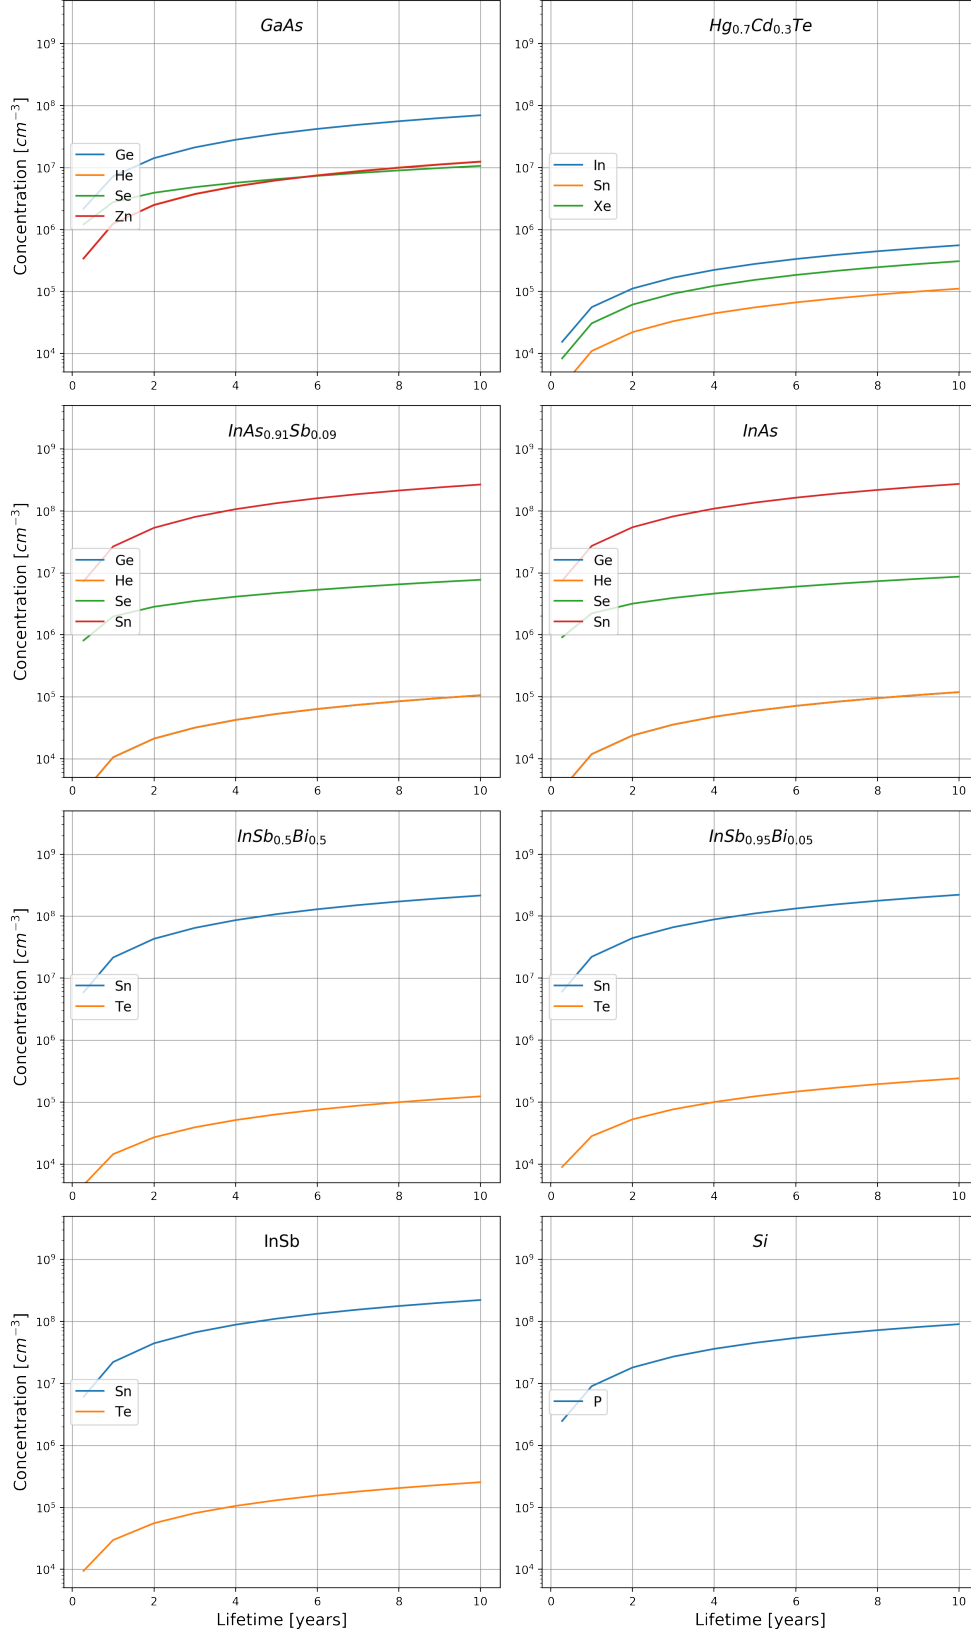

**Fig. 5** Impurity concentration ( $cm^{-3}$ ) for elements with concentrations in excess of  $> 10^5$   $cm^{-3}$  for GaAs,  $Hg_{0.7}Cd_{0.3}Te$ ,  $InAs_{0.91}Sb_{0.09}$ , InAs,  $InSb_{0.5}Bi_{0.5}$ ,  $InSb_{0.95}Bi_{0.05}$ , InSb and Si as a function of lifetime in MEO.

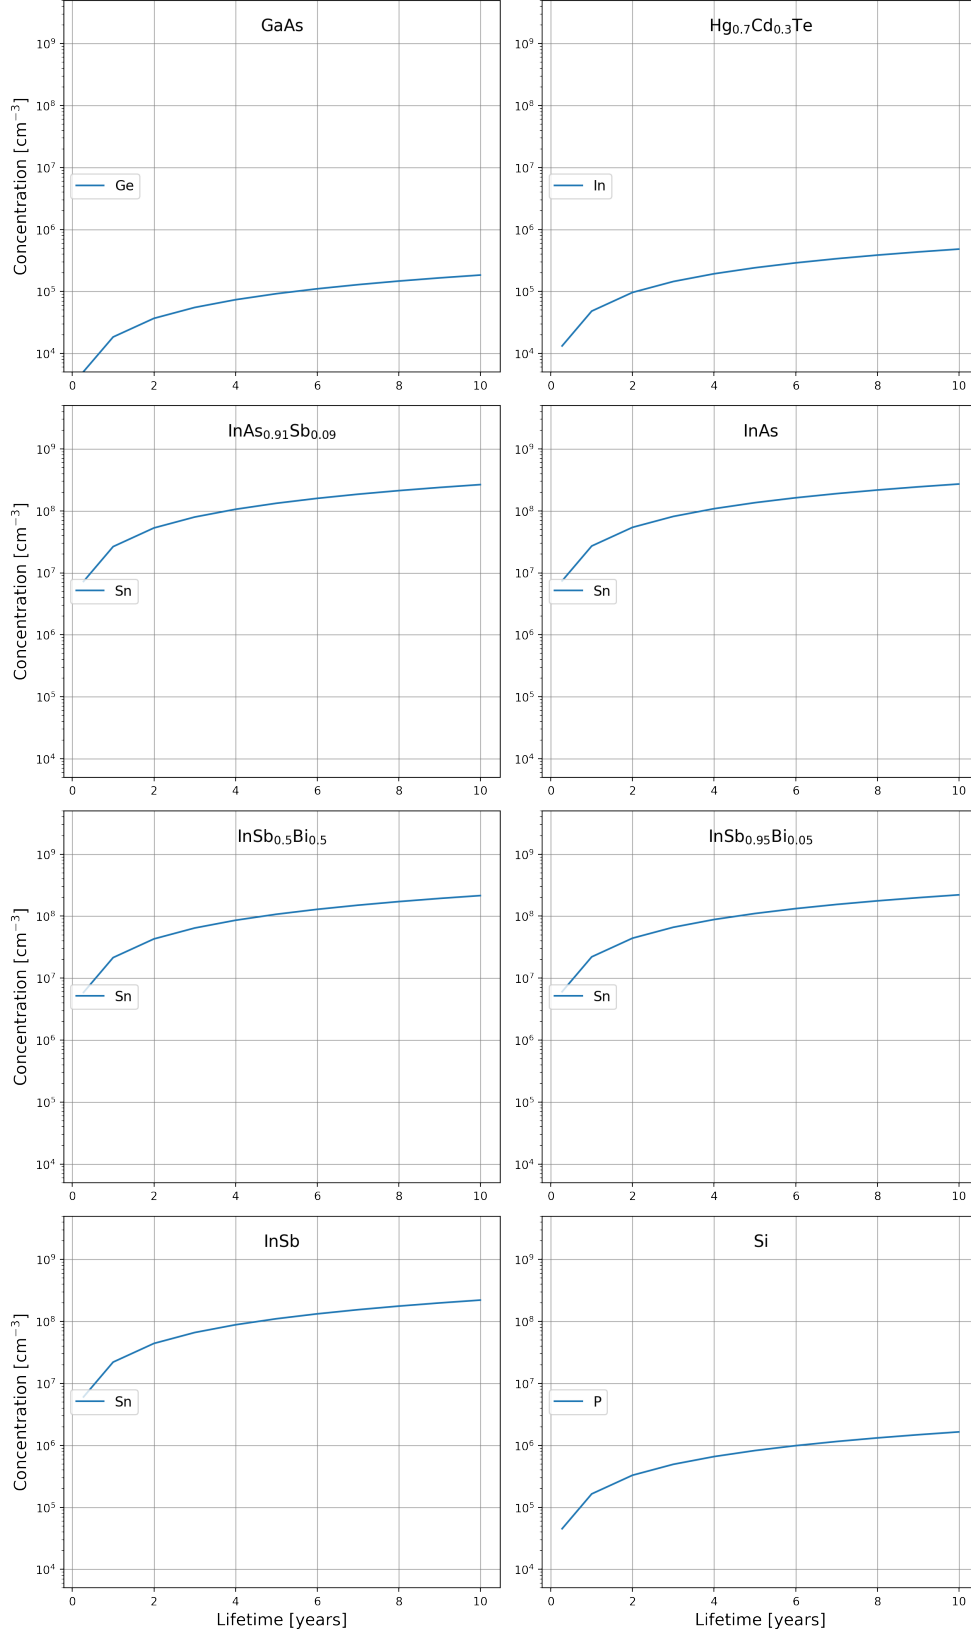

**Fig. 6** Impurity concentration ( $\text{cm}^{-3}$ ) for elements with concentrations in excess of  $> 10^5 \text{ cm}^{-3}$  for GaAs,  $\text{Hg}_{0.7}\text{Cd}_{0.3}\text{Te}$ ,  $\text{InAs}_{0.91}\text{Sb}_{0.09}$ , InAs,  $\text{InSb}_{0.5}\text{Bi}_{0.5}$ ,  $\text{InSb}_{0.95}\text{Bi}_{0.05}$ , InSb and Si as a function of lifetime in GEO.
